# Supplementary material for: Development of a new barcode-based, multiplex-PCR, next-generation-sequencing assay and data processing and analytical pipeline for multiplicity of infection detection of Plasmodium falciparum
Source: Springer Nature journal article supplement (doi:10.1186/s12936-021-03624-2), 2021-02-16

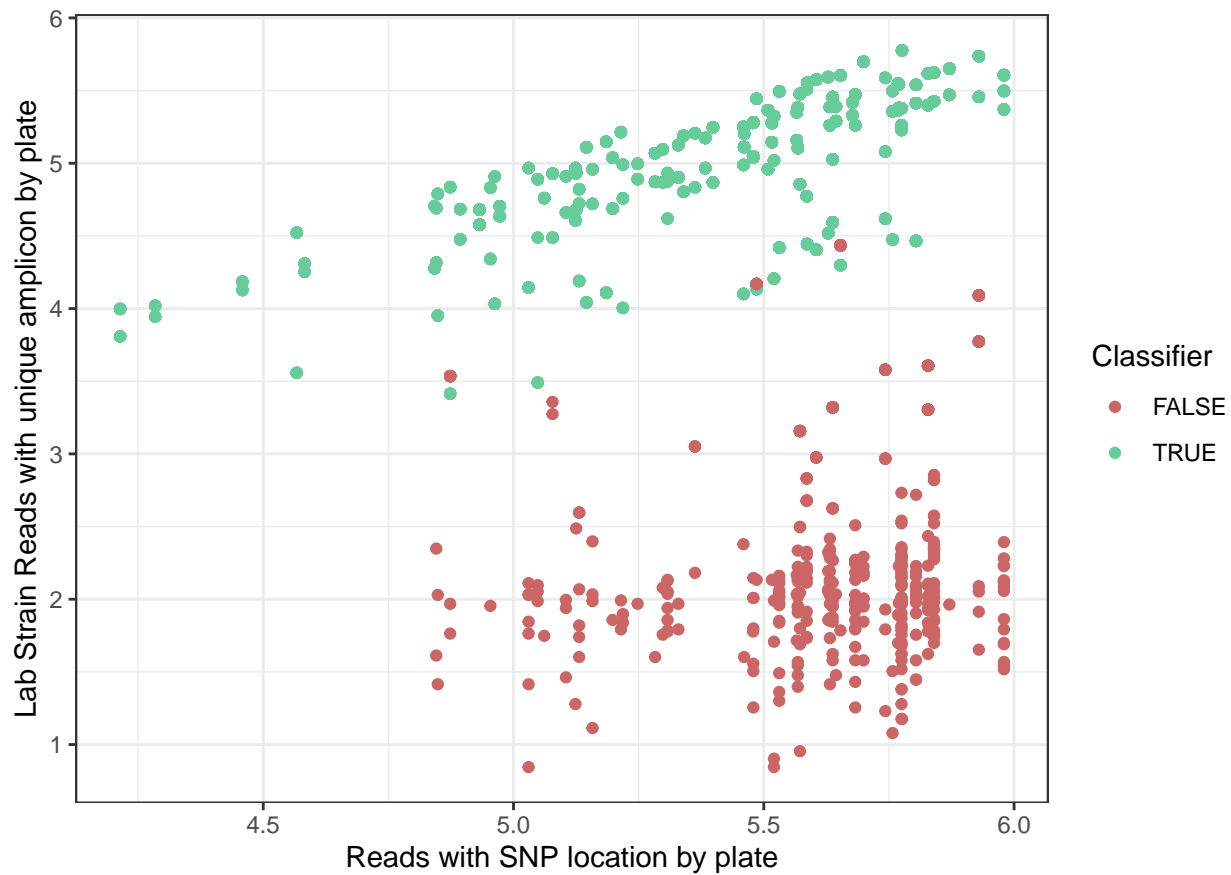

Supplement: MOESM1 [file 18865582]
